# Supplementary material for: Performance of Hop Cultivars Grown with Artificial Lighting under Subtropical Conditions
Source: MDPI journal article supplement (doi:10.3390/plants12101971), 2023-05-12
Supplement: s1 [file s1]

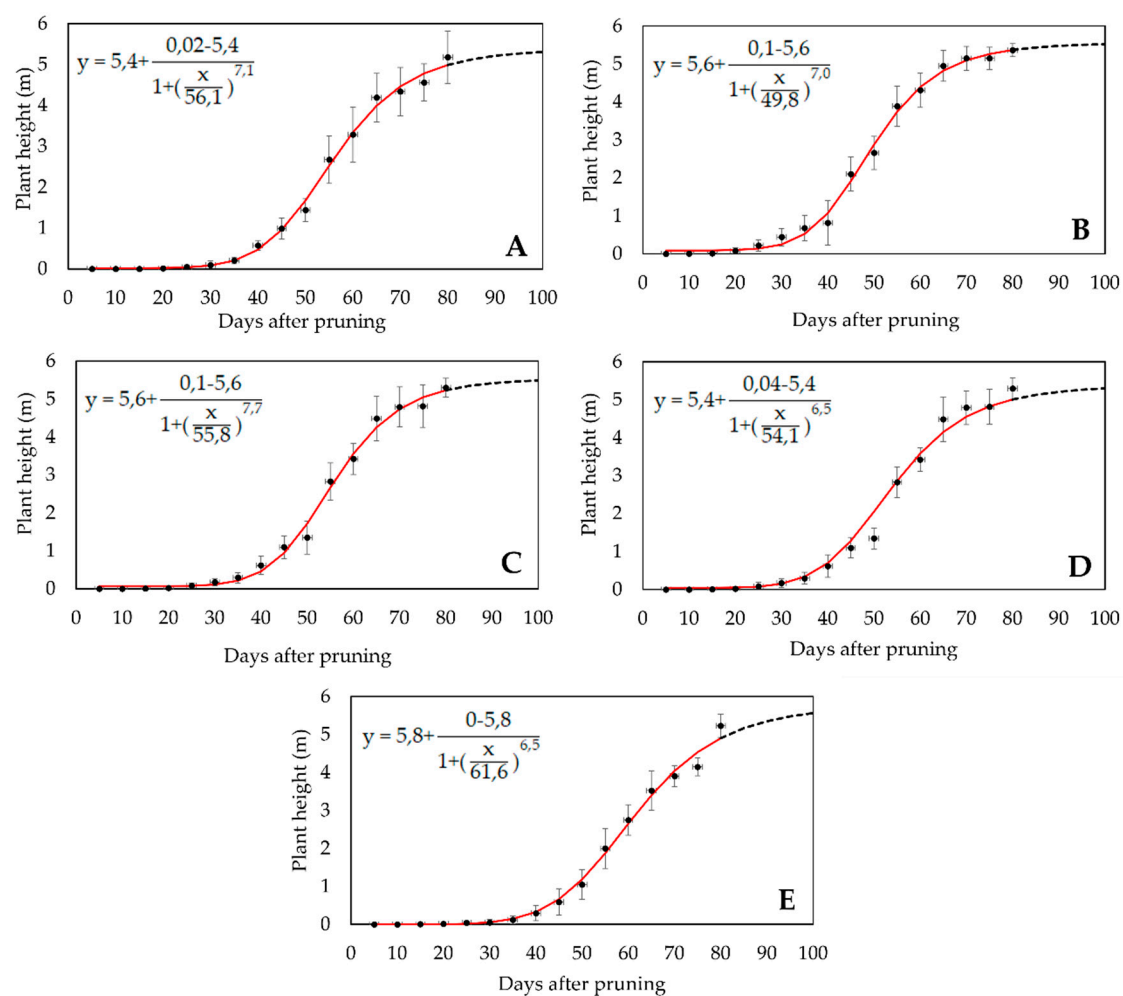

**Figure S1.** Growth development of hop plants, season of 2021. A: 'Hallertau Mittelfrühher'; B: 'Mapuche'; C: 'Northern Brewer'; D: 'Spalter'; E: 'Yakima Gold'; (-----): estimated plant height (m).

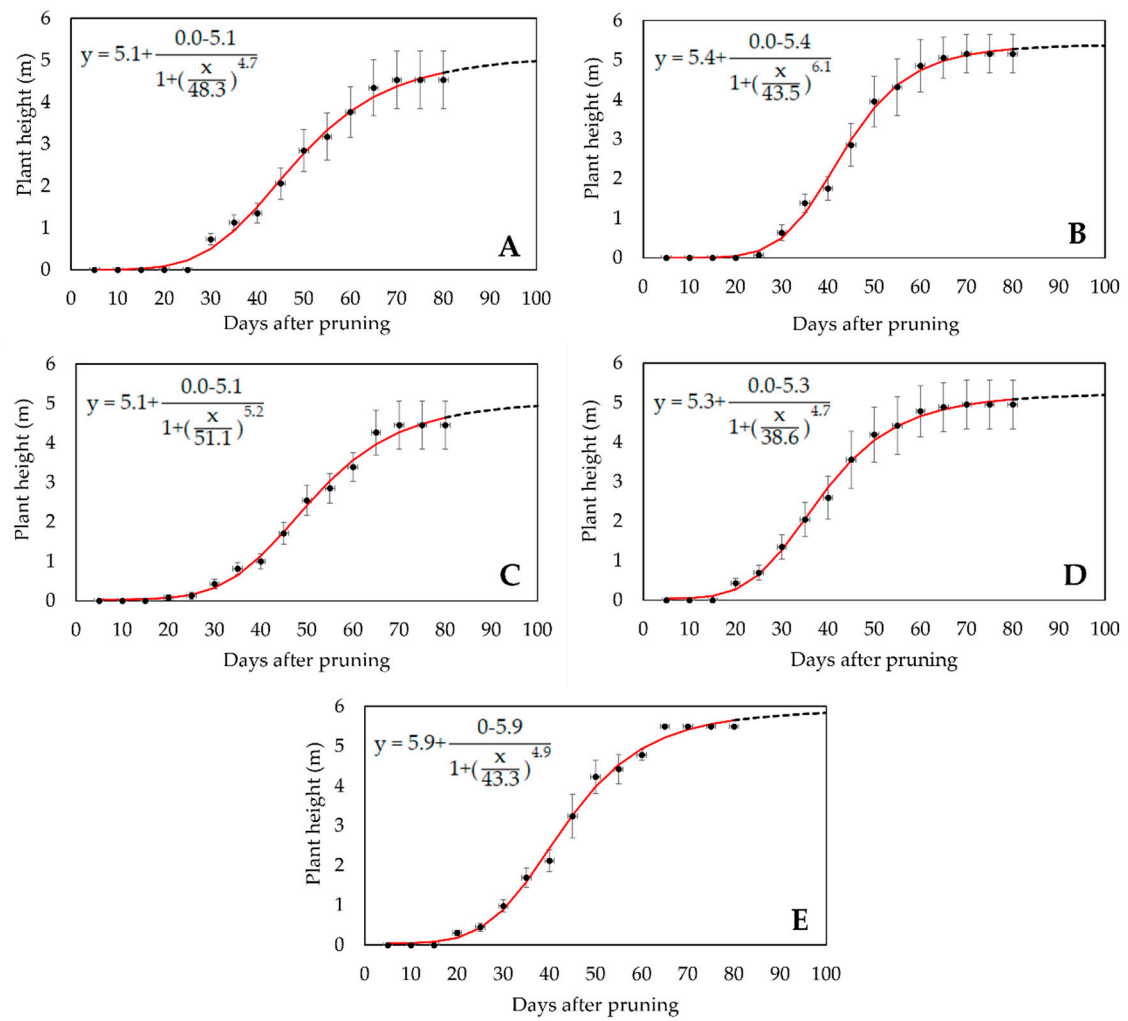

**Figure S2.** Growth development of hop plants, season of 2022. A: 'Hallertau Mittelfrühher'; B: 'Mapuche'; C: 'Northern Brewer'; D: 'Spalter'; E: 'Yakima Gold'; (-----): estimated plant height (m).

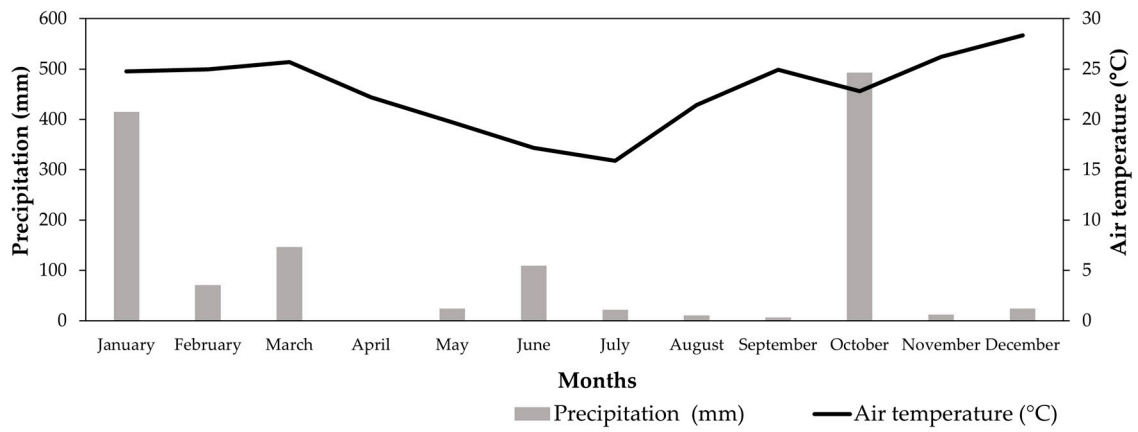

**Figure S3.** Average air temperature and precipitation in Palotina, PR, Brazil in 2021.

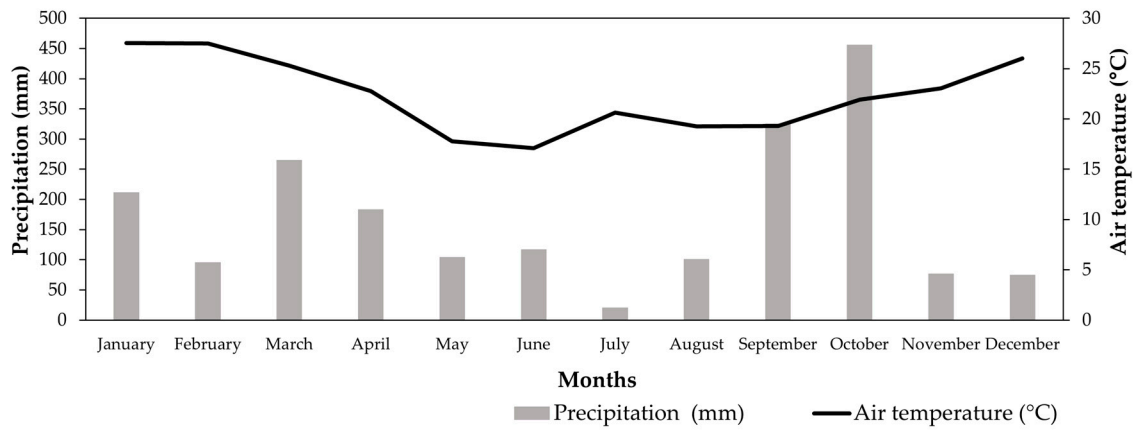

**Figure S4.** Average air temperature and precipitation in Palotina, PR, Brazil in 2022.
